# Supplementary material for: Understanding the effect of lattice polarisability on the electrochemical properties of lithium tetrahaloaluminates, LiAlX4 (X = Cl, Br, I)
Source: Royal Society of Chemistry journal article supplement (doi:10.1039/d2ta02821b), 2022-01-01
Supplement: d2ta02821b1.pdf [file d2ta02821b1.pdf]

## Understanding the effect of lattice polarisability on the electrochemical properties of lithium tetrahaloaluminates, $\text{LiAlX}_4$ ( $\text{X} = \text{Cl}, \text{Br}, \text{I}$ )

*Nicolás Flores-González, Martí López, Nicolò Minafra, Jan Bohnenberger, Francesc Viñes, Svemir Rudić, Ingo Krossing, Wolfgang G. Zeier, Francesc Illas and Duncan H. Gregory\**

Dr. Nicolás Flores-González, Prof. Duncan H. Gregory  
School of Chemistry, Joseph Black Building  
University of Glasgow  
Glasgow, G12 8QQ, United Kingdom  
E-mail: duncan.gregory@glasgow.ac.uk

Martí López, Dr. Francesc Viñes, Prof. Francesc Illas  
Departament de Ciència de Materials i Química Física  
Institut de Química Teòrica i Computacional (IQTCUB)  
Universitat de Barcelona  
C/Martí i Franquès 1, 08028 Barcelona, Spain

Dr. Svemir Rudić  
ISIS Pulsed Neutron and Muon Source  
STFC Rutherford Appleton Laboratory  
Didcot, Oxfordshire, OX11 0QX, United Kingdom

Dr. Nicolò Minafra, Prof. Wolfgang G. Zeier  
Institute for Inorganic and Analytical Chemistry  
University of Münster  
Correnstr. 39, 48149, Germany

Dr. Jan Bohnenberger, Prof. Ingo Krossing  
Institut für Anorganische und Analytische Chemie  
Freiburger Materialforschungszentrum (FMF)  
Universität Freiburg  
Albertstr. 21, 79104 Freiburg, Germany

## Synthesis

Further information on the preparation of each halide is provided below:

**LiAlCl<sub>4</sub>:** The mechanochemical approach was developed by fixing the speed to 450 rpm and gradually increased milling times from 1 to 5 h. LiAlCl<sub>4</sub>, could be formed after milling for 1 h, but LiCl was also evident, suggesting that the reaction was incomplete. After 3 h, the presence of LiCl was negligible. By milling times of 5 h, diffraction peaks corresponding to LiAlCl<sub>4</sub> broadened significantly, suggesting amorphization. Optimum milling parameters of 450 rpm/3 h were adopted to achieve a crystalline, single-phase product.

**LiAlBr<sub>4</sub>:** First attempts to make LiAlBr<sub>4</sub> *via* ball milling were performed using the same parameters employed for LiAlCl<sub>4</sub> above, but milling times needed to be increased to achieve a crystalline, single phase product. Times from 3 h to 9 h were assessed, but LiBr was consistently detected in larger quantities with increased milling time, suggesting decomposition. The rotation speed was subsequently decreased and kept constant at 300 rpm, while the milling time was gradually increased from 4 to 8 h. A milling time of 6 h was found to be optimum to deliver phase-pure LiAlBr<sub>4</sub>.

**LiAlI<sub>4</sub>:** Initially synthesis of LiAlI<sub>4</sub> *via* ball milling was performed using the experimental parameters employed in the preparation of LiAlBr<sub>4</sub> above. Milling times from 1.5 h to 6 h were explored in order to optimise the procedure. After milling for 1.5 h, a new poorly crystalline phase was observed, with neither LiI nor AlI<sub>3</sub> detected. Increasing the milling time simply led to a further decrease of crystallinity. The rotation speed was subsequently decreased from 300 to 200 rpm. The most crystalline phase-pure product was obtained by milling at 200 rpm for 6 h.

## Powder X-Ray Diffraction

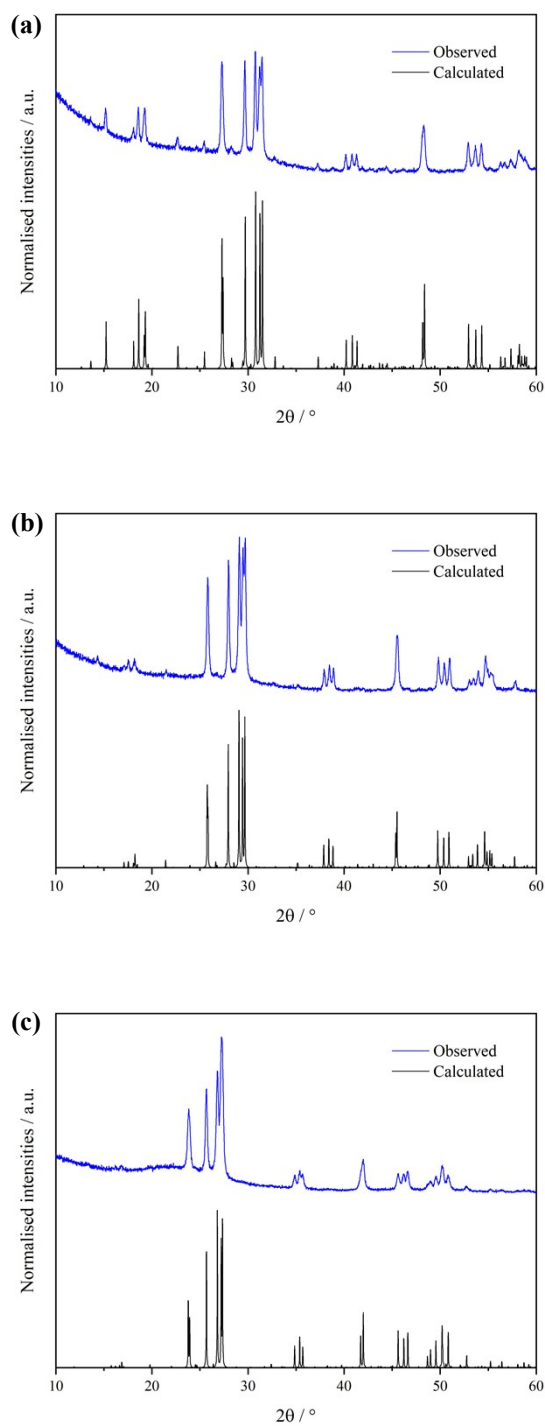

**Figure S1.** Room temperature PXD patterns of mechanochemically-synthesised (a)  $\text{LiAlCl}_4$ , (b)  $\text{LiAlBr}_4$  and (c)  $\text{LiAlI}_4$ , as compared to their respective diffraction patterns simulated with data obtained from Ref.<sup>1</sup>

## Electronic structure

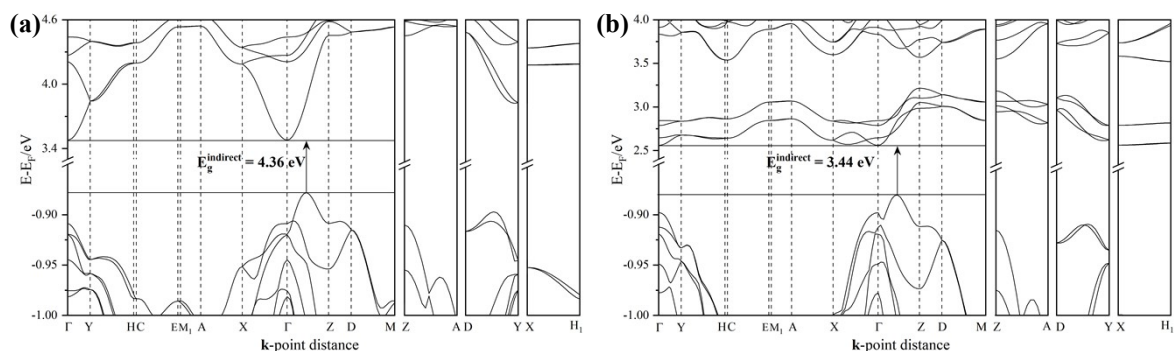

**Figure S2.** Computed (DFT/PBE) band structures of (a) LiAlBr<sub>4</sub> and (b) LiAlI<sub>4</sub>, with band energies scaled to the Fermi level ( $E_F$ ). High symmetry  $k$ -points are noted as well as the indirect gap region between the valence band maximum (VBM) and the conduction band minimum (CBM).

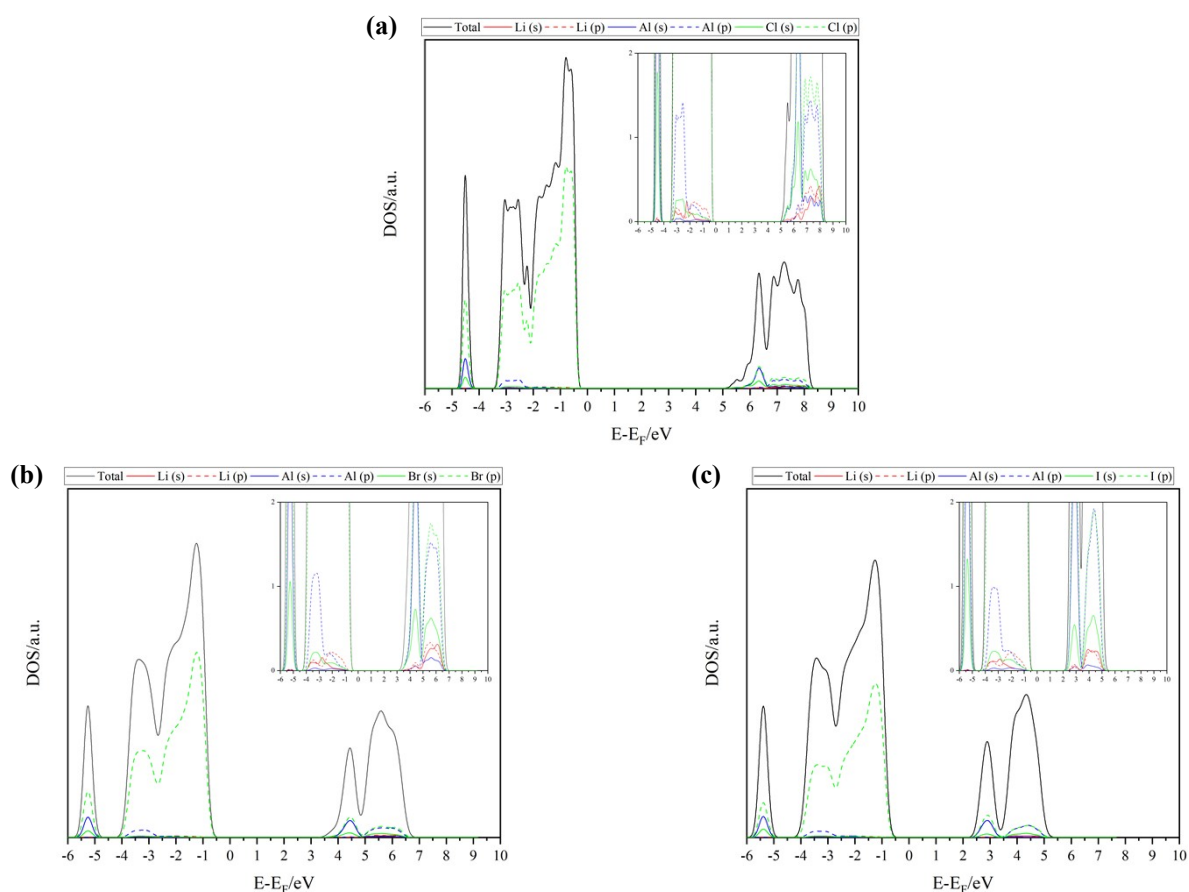

**Figure S3.** Computed (DFT/PBE) total and atom-projected electronic density of states (DOS) of (a) LiAlCl<sub>4</sub>, (b) LiAlBr<sub>4</sub> and (c) LiAlI<sub>4</sub>.

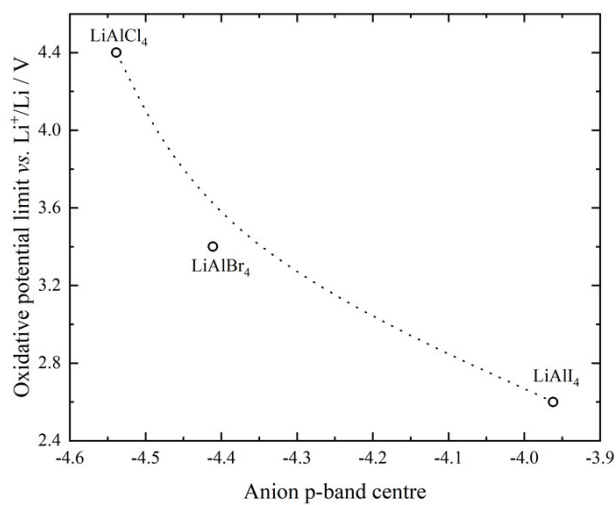

**Figure S4.** Correlation between the measured (by linear sweep voltammetry; LSV<sup>1</sup>) oxidative potential limit and computed (DFT/PBE) anion-p band centre of  $\text{LiAlX}_4$  ( $X = \text{Cl}, \text{Br}, \text{I}$ ) materials. The dotted line is a guide to the eye.

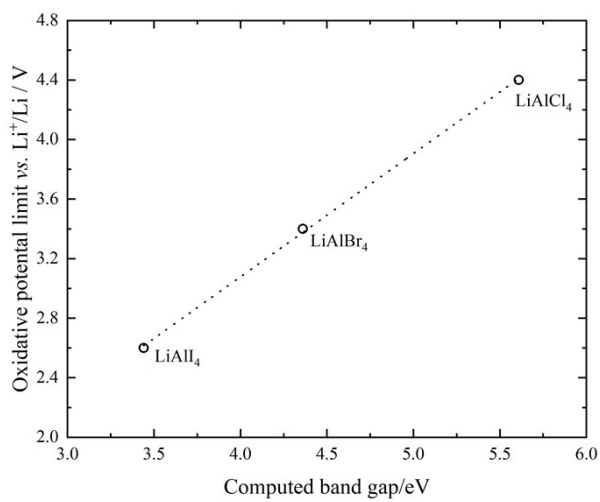

**Figure S5.** Correlation between the measured (LSV<sup>1</sup>) oxidative potential limit and the computed (DFT/PBE) band gap energies of  $\text{LiAlX}_4$  ( $X = \text{Cl}, \text{Br}, \text{I}$ ) materials. The dotted line corresponds to a linear fit ( $R^2 = 1.00$ ).

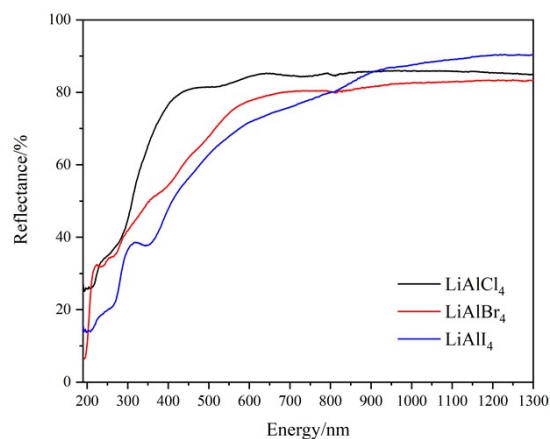

**Figure S6.** DR-UV-Vis spectra of  $\text{LiAlX}_4$  materials ( $X = \text{Cl}, \text{Br}, \text{I}$ ).

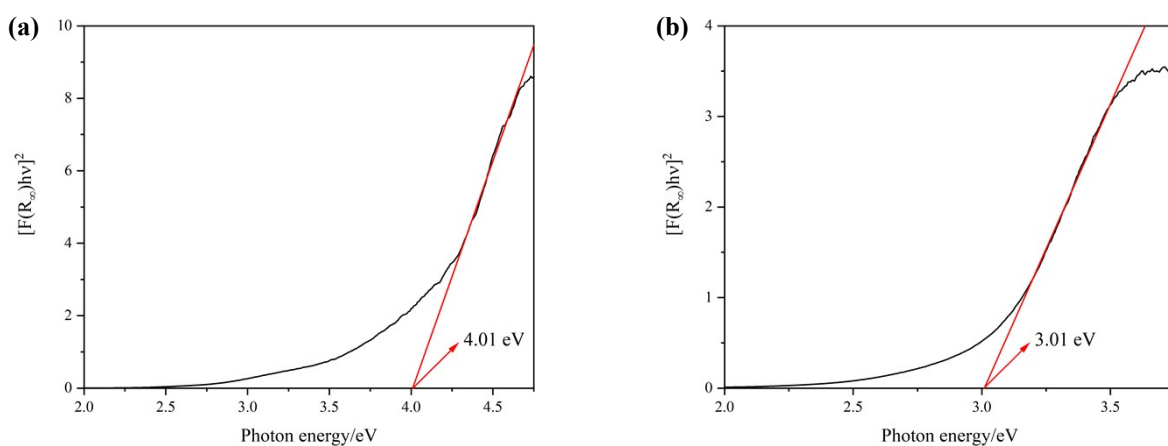

**Figure S7.** Tauc plots for allowed direct transitions in: (a)  $\text{LiAlBr}_4$  and (b)  $\text{LiAlI}_4$ . The red lines correspond to the linear fits.

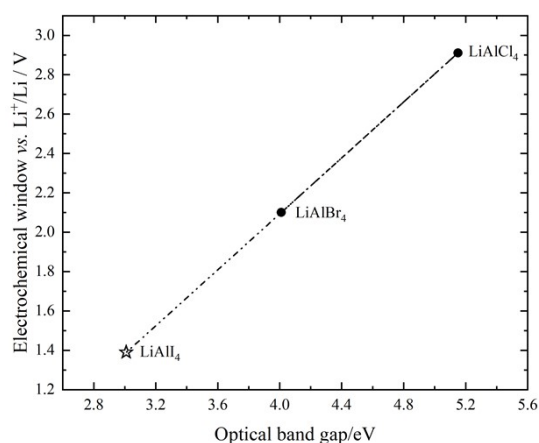

**Figure S8.** Correlation between computed electrochemical window (EW) values available in the literature and measured optical band gaps in  $\text{LiAlX}_4$  ( $X = \text{Cl}, \text{Br}, \text{I}$ ) materials. The EW for  $\text{LiAlI}_4$  is predicted to be 1.4 V vs.  $\text{Li}^+/\text{Li}$ .

## Lattice dynamics

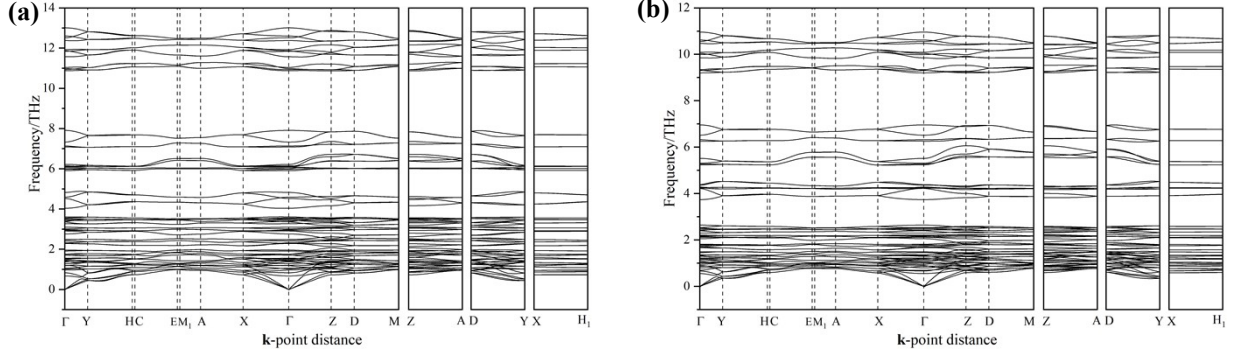

**Figure S9.** Computed (DFPT/PBE) phonon dispersions curves of **(a)** LiAlBr<sub>4</sub> and **(b)** LiAlI<sub>4</sub>.

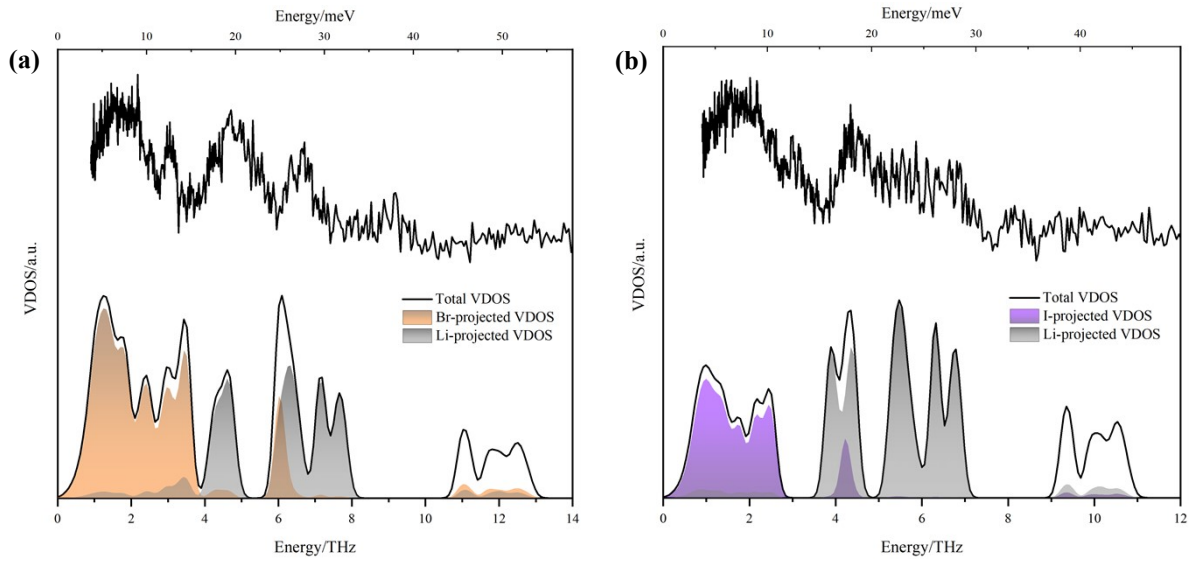

**Figure S10.** Comparison of computed (DFPT/PBE - Bottom) neutron-weighted VDOS vs. the measured INS spectrum collected at 10 K (TOSCA, ISIS - Top) of **(a)** LiAlBr<sub>4</sub> and **(b)** LiAlI<sub>4</sub>.

**Table S1.** Computed (DFPT/PBE average lithium-projected, anion-projected and total VDOS in LiAlX<sub>4</sub> ( $X = \text{Cl, Br, I}$ ).

| Compound            | $\omega_{\text{Li}}$ |      |                  | $\omega_X$ |      |                  | $\omega_{\text{Total}}$ |      |                  |
|---------------------|----------------------|------|------------------|------------|------|------------------|-------------------------|------|------------------|
|                     | THz                  | meV  | cm <sup>-1</sup> | THz        | meV  | cm <sup>-1</sup> | THz                     | meV  | cm <sup>-1</sup> |
| LiAlCl <sub>4</sub> | 6.40                 | 26.5 | 214              | 4.83       | 20.0 | 161              | 5.13                    | 21.2 | 171              |
| LiAlBr <sub>4</sub> | 6.03                 | 25.0 | 201              | 2.88       | 11.9 | 96.0             | 4.73                    | 19.6 | 158              |
| LiAlI <sub>4</sub>  | 5.44                 | 22.5 | 182              | 2.04       | 8.44 | 68.1             | 4.86                    | 20.1 | 162              |

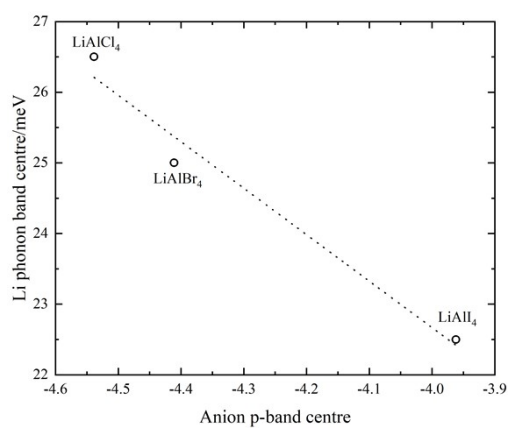

**Figure S11.** Correlation between computed (DFPT/PBE) Li phonon band centres and computed (DFP/PBE) anion-p band centres in  $\text{LiAlX}_4$  materials ( $X = \text{Cl}, \text{Br}, \text{I}$ ). The dotted line corresponds to a linear fit ( $R^2 = 0.972$ ).

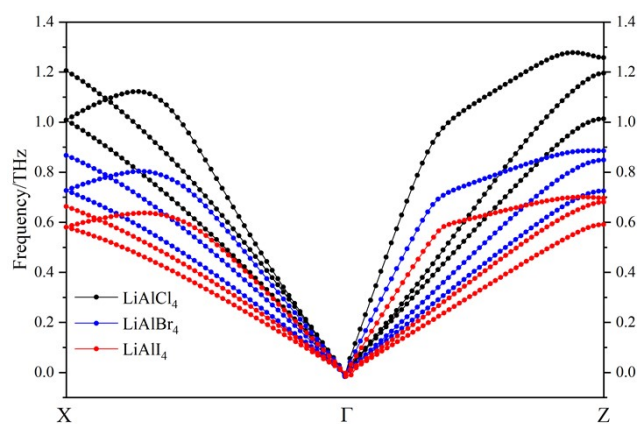

**Figure S12.** Example of computed (DFPT/PBE) acoustic phonon along the  $\Gamma \rightarrow Z$  and  $\Gamma \rightarrow X$  lines in  $\text{LiAlX}_4$  materials ( $X = \text{Cl}, \text{Br}, \text{I}$ ).



## Raman spectra

An isolated  $[AlX_4]^-$  ion has  $3 \times 5 - 6 = 9$  normal modes of vibration which are distributed among the representations of the  $T_d$  point group according to:

$$\Gamma_{optic} = A_1(\text{R}) + E(\text{R}) + 2F_2(\text{R}) \quad (\text{S1})$$

where  $A_1$  is non-degenerate,  $E$  is doubly degenerate and  $F_2$  is triply degenerate, and each term is Raman active. However, these data correspond to the gas phase and do not consider ionic interactions. This is especially true for extended ions, *e.g.* chains, layers, networks. In this work, the normal mode of vibration in crystals were obtained by nuclear site group analysis.<sup>2</sup>  $\text{LiAlX}_4$  ( $X = \text{Cl, Br, I}$ ) crystallise in monoclinic space group  $P2_1/c$  ( $C_{2h}^5$ ), with 24 atoms per unit cell. Since there are four atoms each of Li, Al, X1, X2, X3 X4 atoms that are all symmetry-equivalent, it is immediately seen by inspection of Table S2 that all atoms must occupy  $C_1$  sites.

**Table S2.** Crystallographic sites in ( $C_{2h}^5$ ) space group.

| Space group  | Sites                             |
|--------------|-----------------------------------|
| $(C_{2h}^5)$ | $eC_1(4) + (d + c + b + a)C_1(2)$ |

From Table S3, the vibrational modes of the crystal are then  $18A_g + 18A_u + 18B_g + 18B_u$  for contribution from Li, Al, X1, X2, X3 and X4 and, therefore, the total number of optical branches are  $18A_g + 17A_u + 18B_g + 16B_u$  while the acoustic branches are  $A_u + 2B_u$ . From Table S4, it is found that  $A_g$  and  $B_g$  modes are Raman active and  $A_u$  and  $B_u$  are infrared active. Thus, one can write:

$$\Gamma_{optic} = 18A_g(\text{R}) + 17A_u(\text{IR}) + 18B_g(\text{R}) + 16B_u(\text{IR}) \quad (\text{S2})$$

**Table S3.** Irreducible representations that result from occupying each of the sites within each space group. These give the translational lattice modes.

| Site     | Representation              |
|----------|-----------------------------|
| $C_1$    | $3A_g + 3A_u + 3B_g + 3B_u$ |
| $C_i$    | $3A_u + 3B_u$               |
| $C_2$    | $A_g + A_u + 2B_g + 2B_u$   |
| $C_s$    | $2A_g + A_u + B_g + 2B_u$   |
| $C_{2h}$ | $A_u + 2B_u$                |

**Table S4.** Character table of  $C_{2h}$  point group.

| $C_{2h}$ | E | $C_2^z$ | $i$ | $\sigma_h$ | Selections rules                                           |
|----------|---|---------|-----|------------|------------------------------------------------------------|
| $A_g$    | 1 | 1       | 1   | 1          | $R_z$ $\alpha_{xx}, \alpha_{yy}, \alpha_{zz}, \alpha_{xy}$ |
| $A_u$    | 1 | 1       | -1  | -1         | $T_z$                                                      |
| $B_g$    | 1 | -1      | 1   | -1         | $R_x, R_y$ $\alpha_{xz}, \alpha_{yz}$                      |
| $B_u$    | 1 | -1      | -1  | 1          | $T_x, T_y$                                                 |

The external and internal vibrational modes can be obtained by treating the tetrahaloaluminate anion independently. In other words, one can consider a unit cell built up from two species in each formula unit, *i.e.* a lithium cation and a  $[AlX_4]^-$  anion. Each must occupy  $C_1$  sites, and from Table S3 this gives  $6A_g + 6A_u + 6B_g + 6B_u$  modes.  $A_u + 2B_u$  are acoustical modes so there remain  $6A_g + 5A_u + 6B_g + 4B_u$  modes, which are optical modes of translational character.

From Table S5,  $3A_g + 3A_u + 3B_g + 3B_u$  may be assigned as librational modes resulting from oscillations of the tetrachloroaluminate anion. No librational modes are assigned to the  $Li^+$  cation since it has no rotational degrees of freedom. It should be noted that since  $A_g, A_u, B_g$  and  $B_u$  modes arise from both translational and rotational motions, they may not be assigned as pure librational or pure translational modes. Summing up, the total number of external modes of  $LiAlX_4$  are thus  $9A_g + 8A_u + 9B_g + 7B_u$ . By subtracting the external modes from the total number of modes ( $\Gamma_{optic}$ ), one obtains the result that the internal vibrational modes are  $9A_g + 9A_u + 9B_g + 9B_u$ .

**Table S5.** Librational lattice modes of polyatomic units when placed on each of the possible sites in the unit cell.

| Site     | Representation              |
|----------|-----------------------------|
| $C_1$    | $3A_g + 3A_u + 3B_g + 3B_u$ |
| $C_i$    | $3A_g + 3B_g$               |
| $C_2$    | $A_g + A_u + 2B_g + 2B_u$   |
| $C_s$    | $A_g + 2A_u + 2B_g + B_u$   |
| $C_{2h}$ | $A_g + 2B_g$                |

Computationally, to obtain a Raman spectrum from an optimised crystal structure, one needs to compute: (1) the phonons at the  $\Gamma$  point, *i.e.* the Brillouin zone centre, and (2) the derivative of the polarisability, *i.e.* the macroscopic dielectric tensor<sup>3</sup>. The former gives the vibrational mode frequency and it can be calculated either *via* the finite-displacement (FD) or density-functional perturbation theory (DFPT) approach implemented in VASP. The latter macroscopic dielectric tensor can be obtained *via* Equations S3-S5 already coded in Ref.<sup>4</sup>

$$I_{\text{Raman}} = 45\alpha^2 + 7\beta^2 \quad (\text{S3})$$

$$\alpha = \frac{1}{3}(\alpha_{xx} + \alpha_{yy} + \alpha_{zz}) \quad (\text{S4})$$

$$\beta = \frac{1}{2} \left[ (\alpha_{xx} - \alpha_{yy})^2 + (\alpha_{xx} - \alpha_{zz})^2 + (\alpha_{yy} - \alpha_{zz})^2 + 6(\alpha_{xy}^2 + \alpha_{xz}^2 + \alpha_{yz}^2) \right] \quad (\text{S5})$$

where  $\alpha$  is the mean polarisability derivative and  $\beta$  is the anisotropy of the polarisability tensor derivative. Once the band positions and intensities have been calculated, the spectrum is then fitted by a Gaussian function, already coded in Ref.<sup>4</sup>

**Tables S6.** Experimental and computed Raman (DFT/FD/PBE) frequencies of LiAlX<sub>4</sub> (X = Cl, Br I). $\lambda_{\text{laser}} = 1064 \text{ nm.}$ 

| LiAlCl <sub>4</sub>     |                         |                      | LiAlBr <sub>4</sub>     |                         |                      | LiAlI <sub>4</sub>      |                         |                      |
|-------------------------|-------------------------|----------------------|-------------------------|-------------------------|----------------------|-------------------------|-------------------------|----------------------|
| Experiment              | FD/PBE                  | Mode                 | Experiment              | FD/PBE                  | Mode                 | Experiment              | FD/PBE                  | Mode                 |
| $\omega/\text{cm}^{-1}$ | $\omega/\text{cm}^{-1}$ |                      | $\omega/\text{cm}^{-1}$ | $\omega/\text{cm}^{-1}$ |                      | $\omega/\text{cm}^{-1}$ | $\omega/\text{cm}^{-1}$ |                      |
|                         | 523.4                   | <i>B<sub>g</sub></i> |                         | 428.4                   | <i>B<sub>g</sub></i> |                         | 360.8                   | <i>B<sub>g</sub></i> |
| 520                     | 519.5                   | <i>A<sub>g</sub></i> | 426                     | 425.6                   | <i>A<sub>g</sub></i> | 360                     | 358.6                   | <i>A<sub>g</sub></i> |
|                         | 496.1                   | <i>B<sub>g</sub></i> |                         | 403.5                   | <i>B<sub>g</sub></i> |                         | 341.2                   | <i>B<sub>g</sub></i> |
| 499                     | 494.8                   | <i>A<sub>g</sub></i> | 406                     | 402.6                   | <i>A<sub>g</sub></i> | 343                     | 339.5                   | <i>A<sub>g</sub></i> |
| 466                     | 461.3                   | <i>A<sub>g</sub></i> | 379                     | 373.5                   | <i>A<sub>g</sub></i> | 324                     | 316.6                   | <i>A<sub>g</sub></i> |
|                         | 459.8                   | <i>B<sub>g</sub></i> |                         | 369.9                   | <i>B<sub>g</sub></i> |                         | 312.7                   | <i>B<sub>g</sub></i> |
| 352                     | 344.9                   | <i>A<sub>g</sub></i> |                         | 241.4                   | <i>A<sub>g</sub></i> |                         | 214.1                   | <i>A<sub>g</sub></i> |
|                         | 343.9                   | <i>B<sub>g</sub></i> |                         | 239.6                   | <i>B<sub>g</sub></i> |                         | 212.1                   | <i>B<sub>g</sub></i> |
|                         | 268.9                   | <i>B<sub>g</sub></i> |                         | 210.5                   | <i>B<sub>g</sub></i> |                         | 186.8                   | <i>B<sub>g</sub></i> |
|                         | 267.8                   | <i>A<sub>g</sub></i> | 212                     | 207.9                   | <i>A<sub>g</sub></i> |                         | 179.7                   | <i>A<sub>g</sub></i> |
|                         | 247.5                   | <i>B<sub>g</sub></i> |                         | 206.2                   | <i>B<sub>g</sub></i> |                         | 145.4                   | <i>B<sub>g</sub></i> |
|                         | 246.8                   | <i>A<sub>g</sub></i> |                         | 203.5                   | <i>A<sub>g</sub></i> | 148                     | 144.8                   | <i>A<sub>g</sub></i> |
|                         | 202.7                   | <i>B<sub>g</sub></i> |                         | 163.1                   | <i>B<sub>g</sub></i> |                         | 143.5                   | <i>B<sub>g</sub></i> |
| 192                     | 195.8                   | <i>A<sub>g</sub></i> |                         | 136.6                   | <i>A<sub>g</sub></i> |                         | 127.2                   | <i>A<sub>g</sub></i> |
|                         | 191.5                   | <i>B<sub>g</sub></i> |                         | 122.6                   | <i>B<sub>g</sub></i> |                         | 89.8                    | <i>B<sub>g</sub></i> |
|                         | 179.1                   | <i>A<sub>g</sub></i> |                         | 119.5                   | <i>B<sub>g</sub></i> | 86                      | 85.9                    | <i>A<sub>g</sub></i> |
|                         | 171.6                   | <i>B<sub>g</sub></i> | 121                     | 117.9                   | <i>A<sub>g</sub></i> |                         | 84.3                    | <i>B<sub>g</sub></i> |
| 169                     | 163.3                   | <i>B<sub>g</sub></i> |                         | 113.9                   | <i>A<sub>g</sub></i> |                         | 81.8                    | <i>A<sub>g</sub></i> |
|                         | 162.5                   | <i>A<sub>g</sub></i> |                         | 105.0                   | <i>B<sub>g</sub></i> | 79                      | 75.0                    | <i>B<sub>g</sub></i> |
|                         | 145.0                   | <i>A<sub>g</sub></i> |                         | 102.2                   | <i>A<sub>g</sub></i> |                         | 74.2                    | <i>A<sub>g</sub></i> |
|                         | 133.2                   | <i>B<sub>g</sub></i> |                         | 84.2                    | <i>A<sub>g</sub></i> |                         | 61.6                    | <i>A<sub>g</sub></i> |
| 127                     | 124.9                   | <i>B<sub>g</sub></i> |                         | 83.8                    | <i>B<sub>g</sub></i> |                         | 59.9                    | <i>B<sub>g</sub></i> |
|                         | 122.8                   | <i>A<sub>g</sub></i> |                         | 78.6                    | <i>B<sub>g</sub></i> |                         | 58.1                    | <i>B<sub>g</sub></i> |
|                         | 118.3                   | <i>A<sub>g</sub></i> |                         | 77.6                    | <i>A<sub>g</sub></i> |                         | 56.6                    | <i>A<sub>g</sub></i> |
|                         | 98.5                    | <i>B<sub>g</sub></i> |                         | 66.4                    | <i>B<sub>g</sub></i> |                         | 50.5                    | <i>B<sub>g</sub></i> |
|                         | 92.3                    | <i>A<sub>g</sub></i> |                         | 64.7                    | <i>A<sub>g</sub></i> |                         | 49.3                    | <i>A<sub>g</sub></i> |
|                         | 85.7                    | <i>A<sub>g</sub></i> |                         | 58.4                    | <i>B<sub>g</sub></i> |                         | 45.7                    | <i>B<sub>g</sub></i> |
|                         | 83.1                    | <i>B<sub>g</sub></i> |                         | 57.8                    | <i>A<sub>g</sub></i> |                         | 44.0                    | <i>A<sub>g</sub></i> |
|                         | 74.3                    | <i>B<sub>g</sub></i> |                         | 51.5                    | <i>B<sub>g</sub></i> |                         | 40.8                    | <i>B<sub>g</sub></i> |
|                         | 74.0                    | <i>A<sub>g</sub></i> |                         | 50.3                    | <i>A<sub>g</sub></i> |                         | 39.5                    | <i>A<sub>g</sub></i> |
|                         | 67.7                    | <i>A<sub>g</sub></i> |                         | 48.9                    | <i>B<sub>g</sub></i> |                         | 38.6                    | <i>B<sub>g</sub></i> |
|                         | 64.6                    | <i>B<sub>g</sub></i> |                         | 46.5                    | <i>A<sub>g</sub></i> |                         | 35.4                    | <i>A<sub>g</sub></i> |
|                         | 56.5                    | <i>B<sub>g</sub></i> |                         | 40.3                    | <i>B<sub>g</sub></i> |                         | 32.1                    | <i>B<sub>g</sub></i> |
|                         | 50.9                    | <i>A<sub>g</sub></i> |                         | 35.8                    | <i>A<sub>g</sub></i> |                         | 29.8                    | <i>A<sub>g</sub></i> |
|                         | 50.3                    | <i>B<sub>g</sub></i> |                         | 34.5                    | <i>B<sub>g</sub></i> |                         | 27.2                    | <i>B<sub>g</sub></i> |
|                         | 32.0                    | <i>A<sub>g</sub></i> |                         | 22.6                    | <i>A<sub>g</sub></i> |                         | 18.9                    | <i>A<sub>g</sub></i> |





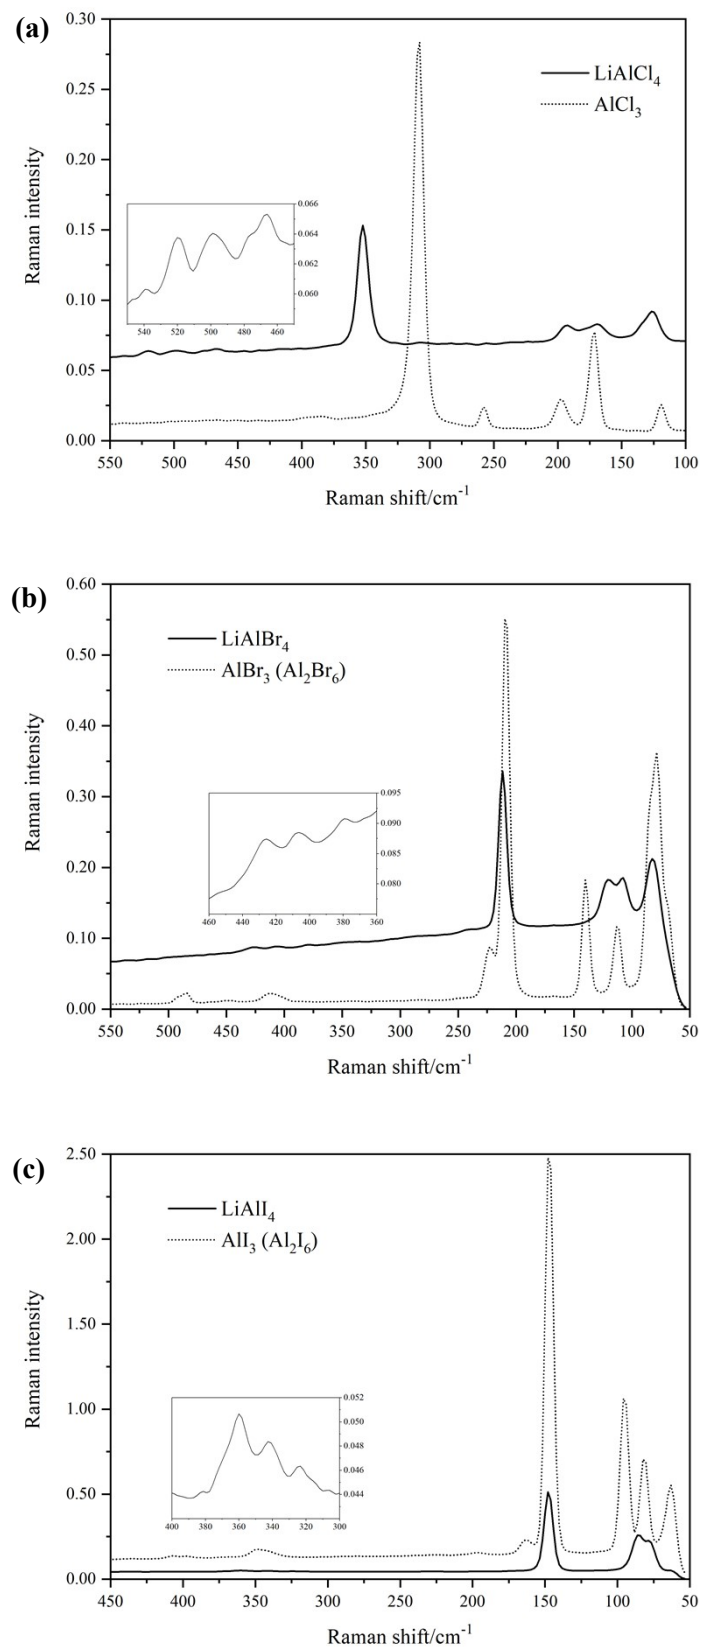

**Figure S16.** Comparison of experimental room temperature Raman spectra of  $\text{LiAlX}_4$  vs.  $\text{AlX}_3$  starting materials. (a)  $X = \text{Cl}$ , (b)  $X = \text{Br}$ , and (c)  $X = \text{I}$  ( $\lambda_{\text{laser}} = 1064 \text{ nm}$ ).

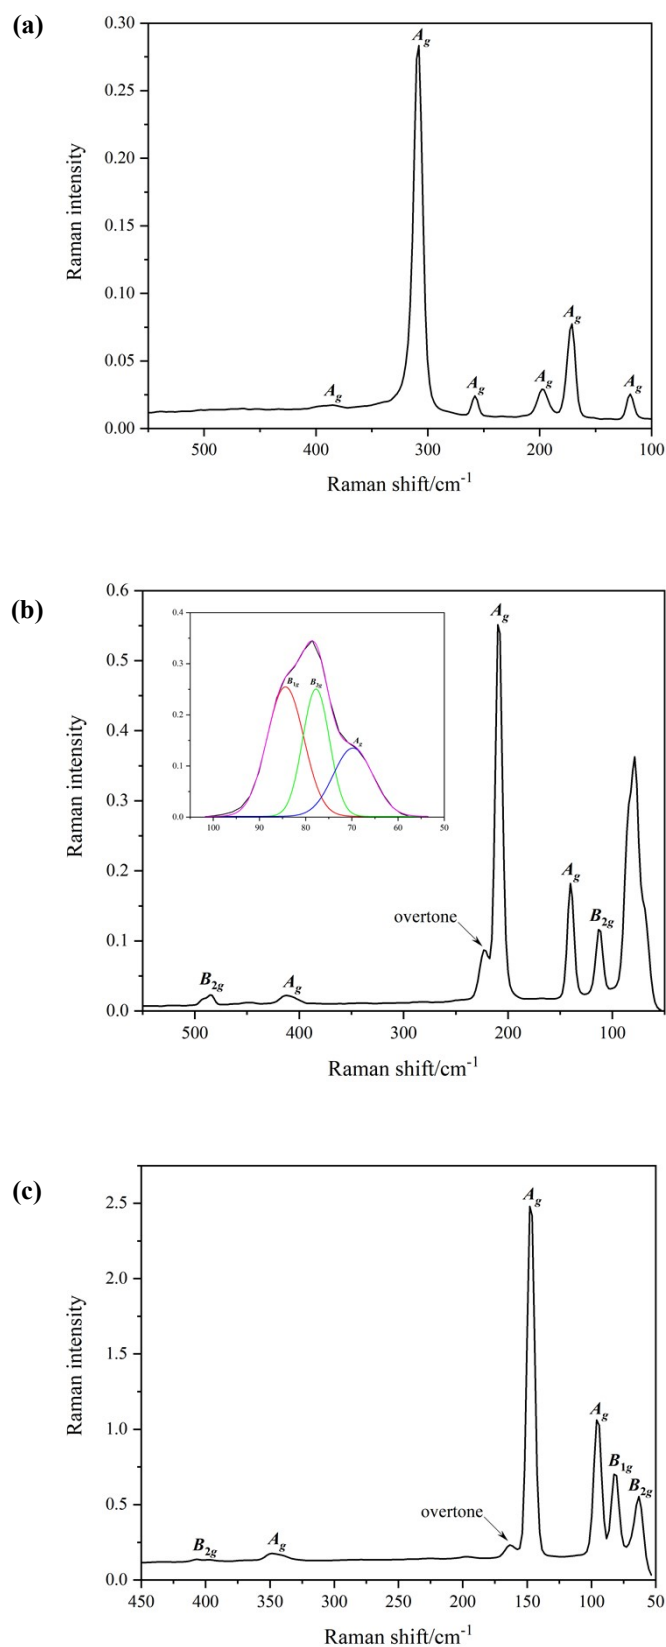

**Figure S17.** Room temperature Raman spectra of (a) AlCl<sub>3</sub>, (b) AlBr<sub>3</sub> and (c) AlI<sub>3</sub>, showing the assignment of their respective bands ( $\lambda_{\text{laser}} = 1064 \text{ nm}$ ).



**Table S7.** Assignment of the Raman wave numbers (in  $\text{cm}^{-1}$ ) for  $\text{AlX}_3$  ( $X = \text{Cl}, \text{Br}, \text{I}$ ).<sup>5-7</sup>

| $\text{AlCl}_3$ | Assignment | $\text{AlBr}_3(\text{Al}_2\text{Br}_6)$ | Assignment      | $\text{AlI}_3(\text{Al}_2\text{I}_6)$ | Assignment      |
|-----------------|------------|-----------------------------------------|-----------------|---------------------------------------|-----------------|
| 385             | $A_g$      | 486                                     | $B_{2g}$        | 406                                   | $B_{2g}$        |
| 308             | $A_g$      | 412                                     | $A_g$           | 349                                   | $A_g$           |
| 258             | $A_g$      | 233                                     | <i>overtone</i> | 163                                   | <i>overtone</i> |
| 198             | $A_g$      | 210                                     | $A_g$           | 148                                   | $A_g$           |
| 171             | $A_g$      | 140                                     | $A_g$           | 96                                    | $A_g$           |
| 119             | $A_g$      | 113                                     | $B_{2g}$        | 82                                    | $B_{1g}$        |
|                 |            | 84 <sup>(a)</sup>                       | $B_{1g}$        | 63                                    | $B_{2g}$        |
|                 |            | 78 <sup>(a)</sup>                       | $B_{3g}$        |                                       |                 |
|                 |            | 70 <sup>(a)</sup>                       | $A_g$           |                                       |                 |

(a) deconvoluted values

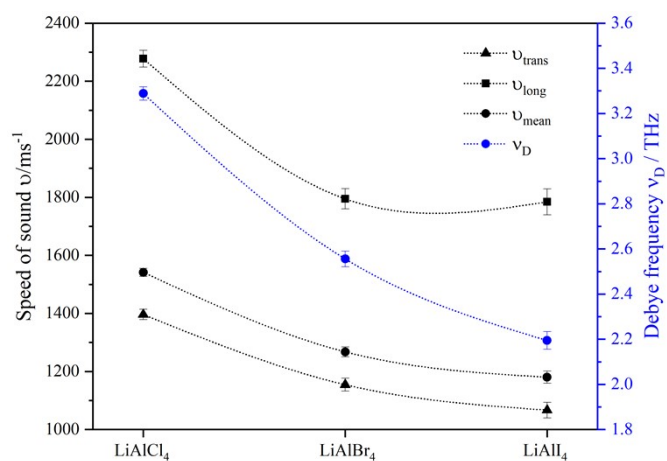

**Figure S18.** Measured longitudinal, transverse and mean speeds of sound in  $\text{LiAlX}_4$  materials ( $X = \text{Cl}, \text{Br}, \text{I}$ ) and their extracted Debye frequencies.

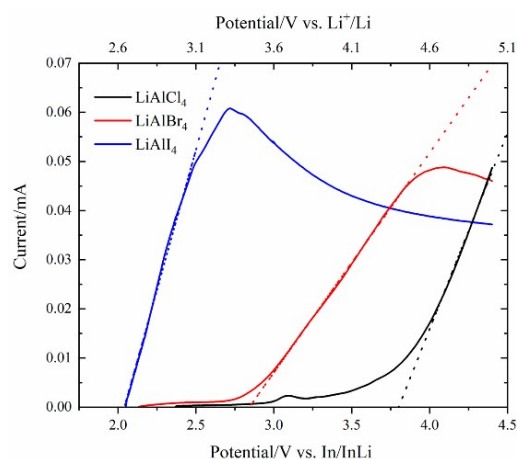

**Figure S19.** Room temperature linear sweep voltammogram ( $0.1 \text{ mV s}^{-1}$ ) of  $\text{InLi}|\text{LiAlX}_4|\text{LiAlX}_4 + \text{C}$  cells. Dashed lines indicate linear fits of the faradaic region. The bottom  $x$ -axis shows the values of the voltage versus  $\text{In}/\text{InLi}$ , the top  $x$ -axis shows the corresponding values of voltage versus  $\text{Li}^+/\text{Li}$ .<sup>1</sup> Further permission related to the material excerpted should be directed to the ACS. <https://pubs.acs.org/doi/10.1021/acsmaterialslett.1c00055>.

**Table S8.** Transport data of mechanochemically-synthesised  $\text{LiAlX}_4$  ( $X = \text{Cl, Br, I}$ ) materials.<sup>1</sup>

| Material          | $\sigma_{\text{RT}} \times 10^5 / \text{S cm}^{-1}$ | $\sigma_0 \times 10^{-5} / \text{K S cm}^{-1}$ | $E_a / \text{eV}$ |
|-------------------|-----------------------------------------------------|------------------------------------------------|-------------------|
| $\text{LiAlCl}_4$ | 2.9(2)                                              | 8.6(7)                                         | 0.473(2)          |
| $\text{LiAlBr}_4$ | 3.3(2)                                              | 2.5(4)                                         | 0.437(4)          |
| $\text{LiAlI}_4$  | 1.2(1)                                              | 0.61(7)                                        | 0.429(3)          |

## References

1. N. Flores-González, N. Minafra, G. Dewald, H. Reardon, R. I. Smith, S. Adams, W. G. Zeier and D. H. Gregory, *ACS Materials Lett.*, 2021, **3**, 652-657.
2. D. L. Rousseau, R. P. Bauman and S. P. S. Porto, *J. Raman Spectrosc.*, 1981, **10**, 253-290.
3. D. Porezag and M. R. Pederson, *Phys. Rev. B*, 1996, **54**, 7830-7836.
4. A. Fonari and S. Stauffer, *vasp\_raman\_py*, <https://github.com/raman-sc/VASP/>.
5. J. A. Sanjurjo, M. A. Pires, G. E. Barberis, C. Rettori and Y. Yacoby, *Molecular Crystals and Liquid Crystals Science and Technology. Section A. Molecular Crystals and Liquid Crystals*, 1994, **244**, 287-292.
6. G. M. Begun, C. R. Boston, G. Torsi and G. Mamantov, *Inorg. Chem.*, 1971, **10**, 886-889.
7. I. R. Beattie, T. Gilson and G. A. Ozin, *J. Chem. Soc. A*, 1968, 813-815.
